# Supplementary material for: Lipidomic profiling analysis of human plasma from subjects with hypercholesterolemia to evaluate the intake of yellow yeast rice fermented by Aspergillus terreus DSMK01
Source: Royal Society of Chemistry journal article supplement (doi:10.1039/d1fo04010c), 2022-01-01
Supplement: d1fo04010c1.pdf [file d1fo04010c1.pdf]

**Lipidomic profiling analysis of human plasma from subjects with hypercholesterolemia to evaluate the intake of yellow yeast rice fermented by *Aspergillus terreus* DSMK01**

Heeyeon Lee<sup>ab#</sup>, Seo Young Jang<sup>ac#</sup>, Youngae Jung<sup>ad</sup>, Oran Kwon<sup>e\*</sup> and Geum-Sook Hwang<sup>ac\*</sup>

<sup>a</sup> *Integrated Metabolomics Research Group, Western Seoul Center, Korea Basic Science Institute, Seoul 03759, Republic of Korea.*

<sup>b</sup> *Graduate School of Pharmaceutical Sciences, Ewha Womans University, Seoul 03760, Republic of Korea*

<sup>c</sup> *Department of Chemistry and Nano Science, Ewha Womans University, Seoul 03760, Republic of Korea*

<sup>d</sup> *Department of Life Science, Ewha Womans University, Seoul 03760, Republic of Korea*

<sup>e</sup> *Department of Nutritional Science and Food Management, Graduate Program in System Health Science and Engineering, Ewha Womans University, Seoul 03760, Republic of Korea.*

\* Corresponding authors.

E-mail: gshwang@kbsi.re.kr (G.-S. Hwang), E-mail: orank@ewha.ac.kr (O. Kwon)

**Table S1.** Clinical characteristics in baseline and post-supplementation of 58 subjects

| Parameter                | Placebo group (n = 27) |               | YYR group (n = 31) |                | <i>p</i> -value <sup>a</sup> | <i>p</i> -value <sup>b</sup> |
|--------------------------|------------------------|---------------|--------------------|----------------|------------------------------|------------------------------|
|                          | 0 week                 | 8 weeks       | 0 week             | 8 weeks        |                              |                              |
| Age (years)              | 55.70 ± 1.62           |               | 55.06 ± 1.17       |                |                              |                              |
| Sex (men/women)          | 7/20                   |               | 6/25               |                |                              |                              |
| BMI (kg/m <sup>2</sup> ) | 23.50 ± 0.38           | 23.55 ± 0.40  | 24.19 ± 0.46       | 24.33 ± 0.48   | 0.153                        | 0.265                        |
| Weight (kg)              | 60.36 ± 1.37           | 60.47 ± 1.37  | 61.46 ± 1.38       | 61.80 ± 1.44   | 0.165                        | 0.657                        |
| Waist circumference (cm) | 81.89 ± 1.30           | 81.43 ± 1.24  | 82.43 ± 1.30       | 82.34 ± 1.37   | 0.681                        | 0.809                        |
| Triglyceride (mg/dL)     | 121.56 ± 11.95         | 115.07 ± 9.77 | 124.71 ± 10.15     | 125.35 ± 10.85 | 0.776                        | 0.346                        |
| TC (mg/dL)               | 231.74 ± 4.61          | 232.96 ± 6.11 | 225.87 ± 4.82      | 193.16 ± 4.51  | <0.001                       | <0.001                       |
| LDL-C(mg/dL)             | 159.89 ± 4.33          | 159.52 ± 5.17 | 155.94 ± 4.40      | 122.71 ± 3.61  | <0.001                       | <0.001                       |
| HDL-C (mg/dL)            | 55.22 ± 2.02           | 56.93 ± 2.49  | 50.16 ± 2.15       | 50.55 ± 1.87   | 0.411                        | 0.054                        |
| ApoA1 (mg/dL)            | 142.59 ± 4.65          | 147.27 ± 5.05 | 136.94 ± 4.23      | 143.28 ± 4.38  | 0.037                        | 0.564                        |
| ApoB (mg/dL)             | 123.84 ± 3.37          | 122.18 ± 3.76 | 124.86 ± 3.50      | 103.75 ± 3.70  | <0.001                       | <0.001                       |
| ApoB/ApoA1 ratio         | 0.90 ± 0.21            | 0.86 ± 0.20   | 0.94 ± 0.24        | 0.75 ± 0.21    | <0.001                       | 0.026                        |

Data are shown as the means ± standard deviations. *p*-value<sup>a</sup> was calculated from the Wilcoxon rank signed tests. 8 weeks comparing to 0 week in YYR group. *p*-value<sup>b</sup> was calculated from Mann–Whitney *U*-tests. 8 weeks of YYR group comparing to 8 weeks of placebo group. Plasma concentrations of triglyceride, TC, LDL-C, HDL-C, ApoA1 and ApoB were determined at weeks 0 and 8 using an automatic analyzer (Hitachi 7600, Hitachi High-Technologies, Tokyo, Japan). Abbreviations: TC, total cholesterol; LDL-C, low density lipoprotein cholesterol; HDL, high density lipoprotein cholesterol; ApoA1, apolipoprotein A1; ApoB, apolipoprotein B.

**Table S2. Identified lipid metabolites with significantly different concentrations between the placebo and YYR groups.**

| Classification   | Lipids    | Ret. Time | <i>m/z</i> | Ion species        | Placebo<br>0 week | Placebo<br>8 week | YYR<br>0 week | YYR<br>8 week | Placebo<br>fold change | YYR<br>fold change | <i>p</i> -values <sup>c</sup> |
|------------------|-----------|-----------|------------|--------------------|-------------------|-------------------|---------------|---------------|------------------------|--------------------|-------------------------------|
| Free Fatty Acids | FFA(10:1) | 1.12      | 171.1417   | [M-H] <sup>-</sup> | 1.5±0.3           | 1.5±0.3           | 1.5±0.3       | 1.5±0.4       | 0.99                   | 1.01               | 0.984                         |
|                  | FFA(12:0) | 1.56      | 199.1704   | [M-H] <sup>-</sup> | 13.7±6.5          | 13.3±5.5          | 10.8±3.6      | 11.0±4.7      | 0.97                   | 1.03               | 0.468                         |
|                  | FFA(14:0) | 2.32      | 227.2017   | [M-H] <sup>-</sup> | 83.1±28.7         | 72.1±25.8         | 70.0±21.8     | 68.6±27.4     | 0.87                   | 0.98               | 0.938                         |
|                  | FFA(14:1) | 1.7       | 225.186    | [M-H] <sup>-</sup> | 15.3±7.1          | 12.9±6.2          | 12.7±3.7      | 12.4±5.7      | 0.84                   | 0.98               | 0.468                         |
|                  | FFA(16:0) | 3.33      | 255.2318   | [M-H] <sup>-</sup> | 1363.3±302.7      | 1229.0±261.3      | 1272.8±222.8  | 1258.4±271.9  | 0.90                   | 0.99               | 0.906                         |
|                  | FFA(16:1) | 2.47      | 253.2172   | [M-H] <sup>-</sup> | 270.7±150.2       | 218.5±110         | 227.9±91.2    | 224.3±106.0   | 0.81                   | 0.98               | 0.969                         |
|                  | FFA(16:2) | 1.95      | 251.2005   | [M-H] <sup>-</sup> | 3.7±1.8           | 3.1±1.3           | 3.5±1.3       | 3.4±1.3       | 0.83                   | 0.97               | 0.875                         |
|                  | FFA(17:0) | 3.89      | 269.2475   | [M-H] <sup>-</sup> | 25.2±8.3          | 22±7.8            | 23.2±10.8     | 21.7±8.0      | 0.88                   | 0.94               | 0.695                         |
|                  | FFA(18:0) | 4.48      | 283.2636   | [M-H] <sup>-</sup> | 900.6±155.8       | 852.8±122.7       | 874.9±125.3   | 855.0±145.6   | 0.95                   | 0.98               | 0.531                         |
|                  | FFA(18:1) | 3.5       | 281.2463   | [M-H] <sup>-</sup> | 1838.1±519.7      | 1625.6±528.1      | 1710.5±478.6  | 1686.4±519.2  | 0.88                   | 0.99               | 0.754                         |
|                  | FFA(18:2) | 2.74      | 279.2313   | [M-H] <sup>-</sup> | 1113.2±362.5      | 976.8±317.6       | 1022.9±330.4  | 1013.3±331.7  | 0.88                   | 0.99               | 0.860                         |
|                  | FFA(18:3) | 2.17      | 277.2167   | [M-H] <sup>-</sup> | 198.3±128.5       | 148.6±69.7        | 163.0±85.0    | 150.5±62.7    | 0.75                   | 0.92               | 0.845                         |
|                  | FFA(18:4) | 1.8       | 275.2012   | [M-H] <sup>-</sup> | 3.5±2.2           | 2.8±1.3           | 3.0±1.5       | 2.9±1.5       | 0.80                   | 0.96               | 0.875                         |
|                  | FFA(20:0) | 5.62      | 311.2918   | [M-H] <sup>-</sup> | 11.0±2.0          | 10.2±1.7          | 10.7±1.5      | 10.2±1.6      | 0.93                   | 0.95               | 0.170                         |
|                  | FFA(20:1) | 4.59      | 309.2781   | [M-H] <sup>-</sup> | 35.6±15.7         | 30.9±15.3         | 32.6±16.2     | 30.3±12.8     | 0.87                   | 0.93               | 0.814                         |
|                  | FFA(20:2) | 3.71      | 307.2609   | [M-H] <sup>-</sup> | 26.2±12.1         | 22.2±10.7         | 22.2±9.4      | 21.1±7.6      | 0.85                   | 0.95               | 0.799                         |
|                  | FFA(20:3) | 3.09      | 305.2471   | [M-H] <sup>-</sup> | 27.6±13.5         | 22.5±9.1          | 22.2±8.1      | 21.6±7.6      | 0.82                   | 0.97               | 0.814                         |
|                  | FFA(20:4) | 2.63      | 303.2303   | [M-H] <sup>-</sup> | 78.1±29.0         | 66.3±23.2         | 68.9±19.4     | 70.8±23.4     | 0.85                   | 1.03               | 0.531                         |
|                  | FFA(20:5) | 2.08      | 301.2152   | [M-H] <sup>-</sup> | 23.5±15.4         | 20.5±11.9         | 23.6±14.5     | 21.2±11.7     | 0.87                   | 0.90               | 0.433                         |
|                  | FFA(22:0) | 6.78      | 339.3226   | [M-H] <sup>-</sup> | 6.1±1.5           | 5.7±0.7           | 6.0±1.2       | 5.9±0.9       | 0.93                   | 0.98               | 0.769                         |
|                  | FFA(22:1) | 5.7       | 337.3087   | [M-H] <sup>-</sup> | 3.6±1.2           | 3.5±1.4           | 3.7±1.9       | 3.5±1.7       | 0.96                   | 0.96               | 0.638                         |
|                  | FFA(22:2) | 4.8       | 335.2944   | [M-H] <sup>-</sup> | 1.1±0.4           | 0.9±0.3           | 0.9±0.3       | 0.9±0.3       | 0.85                   | 0.97               | 0.681                         |
|                  | FFA(22:3) | 4.06      | 333.2805   | [M-H] <sup>-</sup> | 0.8±0.4           | 0.7±0.2           | 0.7±0.2       | 0.7±0.2       | 0.84                   | 1.01               | 0.829                         |
|                  | FFA(22:4) | 3.43      | 331.261    | [M-H] <sup>-</sup> | 14.3±5.9          | 12.1±4.7          | 12.1±4.5      | 11.9±4.1      | 0.85                   | 0.98               | 0.829                         |
|                  | FFA(22:5) | 2.8       | 329.2472   | [M-H] <sup>-</sup> | 33.9±17.5         | 28.6±14.3         | 31.0±13.5     | 28.9±11.5     | 0.84                   | 0.93               | 0.695                         |
|                  | FFA(22:6) | 2.39      | 327.2327   | [M-H] <sup>-</sup> | 155.0±74.8        | 138.1±70.4        | 145.8±66.4    | 135.8±53.7    | 0.89                   | 0.93               | 0.638                         |

|              |              |       |          |                                      |              |              |              |              |      |      |       |
|--------------|--------------|-------|----------|--------------------------------------|--------------|--------------|--------------|--------------|------|------|-------|
|              | FFA(24:0)    | 8.2   | 367.3524 | [M-H] <sup>-</sup>                   | 9.3±3.2      | 8.7±2.1      | 8.9±3.0      | 8.6±2.0      | 0.93 | 0.97 | 0.666 |
|              | FFA(26:0)    | 10.02 | 395.3867 | [M-H] <sup>-</sup>                   | 2.9±0.9      | 2.7±0.8      | 2.9±1.2      | 2.8±0.9      | 0.93 | 0.98 | 0.739 |
| Lyso species | LysoPC(14:0) | 2.16  | 468.3065 | [M+H] <sup>+</sup>                   | 28.1±9.4     | 27.7±8.9     | 25.7±7.1     | 25.5±7.4     | 0.98 | 0.99 | 0.984 |
|              | LysoPC(16:0) | 3.13  | 496.3391 | [M+H] <sup>+</sup>                   | 3171.4±684.9 | 3176.5±480.8 | 3266.4±534.2 | 3260.6±528.8 | 1.00 | 1.00 | 0.784 |
|              | LysoPC(16:1) | 2.3   | 494.3216 | [M+H] <sup>+</sup>                   | 59.2±17.4    | 56.8±16.1    | 57.9±18.3    | 61.2±16.7    | 0.96 | 1.06 | 0.399 |
|              | LysoPC(17:0) | 3.66  | 510.3533 | [M+H] <sup>+</sup>                   | 29.8±9.0     | 27.4±5.6     | 30.2±7.1     | 29.7±6.7     | 0.92 | 0.98 | 0.739 |
|              | LysoPC(17:1) | 2.81  | 508.3381 | [M+H] <sup>+</sup>                   | 7.5±2.0      | 7.3±1.7      | 7.6±1.6      | 7.7±1.7      | 0.97 | 1.01 | 0.531 |
|              | LysoPC(18:0) | 4.23  | 524.3694 | [M+H] <sup>+</sup>                   | 1194.8±274.9 | 1106.9±188.4 | 1197.7±237.9 | 1145.2±227.7 | 0.93 | 0.96 | 0.299 |
|              | LysoPC(18:1) | 3.25  | 522.3545 | [M+H] <sup>+</sup>                   | 516.5±146.5  | 534.4±108.1  | 507.1±125.3  | 562.8±144.4  | 1.03 | 1.11 | 0.009 |
|              | LysoPC(18:2) | 2.55  | 520.3375 | [M+H] <sup>+</sup>                   | 917.0±278.6  | 1068.7±341.0 | 915.5±259.9  | 956.7±307.7  | 1.17 | 1.05 | 0.570 |
|              | LysoPC(18:3) | 1.94  | 576.3313 | [M+CH <sub>3</sub> COO] <sup>-</sup> | 4.9±2.1      | 4.5±1.9      | 4.3±1.8      | 4.8±2        | 0.92 | 1.11 | 0.081 |
|              | LysoPC(20:0) | 5.28  | 552.4048 | [M+H] <sup>+</sup>                   | 7.2±2.1      | 7.3±2.2      | 7.5±1.7      | 7.4±2.1      | 1.01 | 0.99 | 0.468 |
|              | LysoPC(20:1) | 4.25  | 550.3838 | [M+H] <sup>+</sup>                   | 10.5±2.3     | 10.7±2.4     | 11.3±2.7     | 11.6±3.8     | 1.02 | 1.03 | 0.481 |
|              | LysoPC(20:2) | 3.48  | 548.3704 | [M+H] <sup>+</sup>                   | 11.3±2.3     | 11.6±2.5     | 10.5±1.8     | 11.3±2.6     | 1.03 | 1.07 | 0.085 |
|              | LysoPC(20:3) | 2.86  | 546.3553 | [M+H] <sup>+</sup>                   | 59.0±19.3    | 60.0±14.0    | 51.8±13.9    | 58.3±14.6    | 1.02 | 1.12 | 0.040 |
|              | LysoPC(20:4) | 2.44  | 544.339  | [M+H] <sup>+</sup>                   | 12.7±3.6     | 13.4±3.9     | 12.5±4.5     | 14.2±4.6     | 1.05 | 1.14 | 0.008 |
|              | LysoPC(20:5) | 1.95  | 542.3235 | [M+H] <sup>+</sup>                   | 34.6±16.0    | 36.6±18.0    | 36.3±15.5    | 40.0±21.1    | 1.06 | 1.10 | 0.256 |
|              | LysoPC(22:0) | 6.3   | 580.431  | [M+H] <sup>+</sup>                   | 1.6±0.7      | 1.7±0.7      | 1.7±0.5      | 1.6±0.6      | 1.06 | 0.93 | 0.131 |
|              | LysoPC(22:1) | 5.3   | 578.4163 | [M+H] <sup>+</sup>                   | 1.3±0.8      | 1.4±0.9      | 1.7±1.3      | 1.6±1.6      | 1.09 | 0.96 | 0.710 |
|              | LysoPC(22:5) | 2.59  | 570.3562 | [M+H] <sup>+</sup>                   | 14.2±4.1     | 13.7±3.5     | 14.3±4.1     | 14.3±4.5     | 0.97 | 1.00 | 0.710 |
|              | LysoPC(22:6) | 2.31  | 538.3402 | [M+H] <sup>+</sup>                   | 80.6±31.2    | 78.2±27.2    | 81.9±24.6    | 83.7±30.6    | 0.97 | 1.02 | 0.922 |
|              | LysoPC(24:0) | 7.32  | 666.4568 | [M+CH <sub>3</sub> COO] <sup>-</sup> | 1.2±0.4      | 1.2±0.3      | 1.2±0.3      | 1.2±0.4      | 0.96 | 1.00 | 0.318 |
|              | LysoPE(16:0) | 3.25  | 454.2912 | [M+H] <sup>+</sup>                   | 20.3±5.4     | 20.8±5.9     | 21.4±5.9     | 21.7±5.2     | 1.02 | 1.02 | 0.264 |
|              | LysoPE(18:0) | 4.37  | 482.2928 | [M+H] <sup>+</sup>                   | 29.4±7.3     | 29.5±6.0     | 29.7±5.6     | 30.1±5.4     | 1.00 | 1.01 | 0.378 |
|              | LysoPE(18:1) | 3.25  | 478.2911 | [M+H] <sup>+</sup>                   | 6.9±3.2      | 8.1±3.7      | 6.9±3.6      | 7.9±3.1      | 1.18 | 1.14 | 0.036 |
|              | LysoPE(18:2) | 2.65  | 478.2928 | [M+H] <sup>+</sup>                   | 35.9±14.7    | 39.3±17.6    | 32.7±11.8    | 33.4±12.3    | 1.09 | 1.02 | 0.710 |
|              | LysoPE(20:4) | 2.54  | 502.2881 | [M+H] <sup>+</sup>                   | 15.0±5.7     | 16.1±4.8     | 13.9±5.1     | 15.9±5.4     | 1.07 | 1.15 | 0.009 |
|              | LysoPE(20:5) | 2.05  | 500.2751 | [M+H] <sup>+</sup>                   | 3.9±1.5      | 3.9±1.7      | 4.0±1.5      | 4.1±1.9      | 1.02 | 1.02 | 0.531 |
|              | LysoPE(22:6) | 2.4   | 526.2928 | [M+H] <sup>+</sup>                   | 40.6±9.6     | 40.0±10.3    | 40.5±10.0    | 40.8±11.0    | 0.98 | 1.01 | 0.938 |

|                      |          |       |          |                         |                |                |                |                |      |      |       |
|----------------------|----------|-------|----------|-------------------------|----------------|----------------|----------------|----------------|------|------|-------|
| Glycerophospholipids | PC(28:0) | 7.84  | 678.504  | [M+CH3COO] <sup>-</sup> | 16.4±5.1       | 18.9±9.5       | 14.8±4.5       | 14.0±3.3       | 1.15 | 0.94 | 0.505 |
|                      | PC(30:0) | 9.46  | 706.5362 | [M+CH3COO] <sup>-</sup> | 153.2±39.3     | 156.5±59.3     | 134.6±36.9     | 121.8±32.4     | 1.02 | 0.90 | 0.203 |
|                      | PC(30:2) | 8.07  | 702.5584 | [M+CH3COO] <sup>-</sup> | 216.2±39.7     | 208.7±33.8     | 209.8±29.8     | 201.8±38.5     | 0.96 | 0.96 | 0.104 |
|                      | PC(31:1) | 10.65 | 718.5895 | [M+CH3COO] <sup>-</sup> | 20.8±4.4       | 21.2±4.9       | 20.0±3.1       | 19.6±3.2       | 1.02 | 0.98 | 0.544 |
|                      | PC(32:0) | 11.07 | 792.5722 | [M+CH3COO] <sup>-</sup> | 497.8±59.9     | 503.7±80.8     | 488.7±61.4     | 457.3±64.1     | 1.01 | 0.94 | 0.020 |
|                      | PC(32:1) | 9.3   | 790.5585 | [M+CH3COO] <sup>-</sup> | 525.0±208.4    | 482.7±204.8    | 463.1±207.0    | 459.8±196.1    | 0.92 | 0.99 | 0.710 |
|                      | PC(32:2) | 8.04  | 788.5326 | [M+CH3COO] <sup>-</sup> | 144.7±43.5     | 145.1±48.5     | 130.7±43.7     | 118.7±37.6     | 1.00 | 0.91 | 0.164 |
|                      | PC(32:3) | 7.15  | 786.5282 | [M+CH3COO] <sup>-</sup> | 4.5±2.6        | 3.5±1.7        | 3.8±2.4        | 3.1±1.6        | 0.78 | 0.82 | 0.196 |
|                      | PC(33:0) | 12.14 | 748.5877 | [M+CH3COO] <sup>-</sup> | 16.1±5.5       | 14.4±5.1       | 13.9±4.1       | 13.2±3.2       | 0.90 | 0.95 | 0.481 |
|                      | PC(34:0) | 13.31 | 820.5971 | [M+CH3COO] <sup>-</sup> | 129.7±14.8     | 130.2±15.9     | 132.5±18.9     | 123.7±17.0     | 1.00 | 0.93 | 0.007 |
|                      | PC(34:1) | 11.17 | 818.5878 | [M+CH3COO] <sup>-</sup> | 7317.4±1933.6  | 6992.3±1407.5  | 6814.1±1866.0  | 6844.3±1492.6  | 0.96 | 1.00 | 0.710 |
|                      | PC(34:2) | 9.69  | 816.5641 | [M+CH3COO] <sup>-</sup> | 20936.0±1961.6 | 21262.0±1970.3 | 20616.2±1455.1 | 20282.7±1769.3 | 1.02 | 0.98 | 0.281 |
|                      | PC(34:3) | 8.79  | 814.5539 | [M+CH3COO] <sup>-</sup> | 171.7±58.9     | 164.8±50.4     | 161.5±55.1     | 156.7±44.8     | 0.96 | 0.97 | 0.710 |
|                      | PC(34:4) | 7.25  | 812.5328 | [M+CH3COO] <sup>-</sup> | 40.5±12.6      | 40.5±14.8      | 37.3±13.3      | 37.7±14.1      | 1.00 | 1.01 | 0.610 |
|                      | PC(34:5) | 6.99  | 810.51   | [M+CH3COO] <sup>-</sup> | 7.2±3.2        | 7.8±5.4        | 7.3±4.0        | 6.8±3.5        | 1.08 | 0.93 | 0.399 |
|                      | PC(36:0) | 14.28 | 790.628  | [M+CH3COO] <sup>-</sup> | 14.6±2.7       | 14.0±2.0       | 15.5±3.3       | 14.0±1.9       | 0.96 | 0.91 | 0.010 |
|                      | PC(36:1) | 13.28 | 846.5961 | [M+CH3COO] <sup>-</sup> | 1508.1±412.2   | 1426.6±280.1   | 1435.7±255.0   | 1468.6±375.6   | 0.95 | 1.02 | 0.570 |
|                      | PC(36:2) | 11.66 | 844.5977 | [M+CH3COO] <sup>-</sup> | 8198.1±1668.5  | 8017.0±1880.6  | 7748.1±1376.3  | 7194.0±1435.7  | 0.98 | 0.93 | 0.034 |
|                      | PC(36:3) | 9.76  | 842.5693 | [M+CH3COO] <sup>-</sup> | 2363.1±683.5   | 2251.6±530.5   | 2067.0±568.6   | 2111.3±606.6   | 0.95 | 1.02 | 0.754 |
|                      | PC(36:4) | 9.43  | 840.5741 | [M+CH3COO] <sup>-</sup> | 6963.8±1580.1  | 6923.9±1606.6  | 6663.9±1905.4  | 7269.2±1908.7  | 0.99 | 1.09 | 0.010 |
|                      | PC(36:5) | 8.32  | 838.5597 | [M+CH3COO] <sup>-</sup> | 9.6±1.6        | 10.3±2.4       | 9.3±1.8        | 8.9±1.7        | 1.07 | 0.97 | 0.531 |
|                      | PC(36:6) | 7.5   | 836.5398 | [M+CH3COO] <sup>-</sup> | 8.1±3.8        | 8.1±4.7        | 8.3±3.8        | 8.3±4.2        | 1.01 | 1.00 | 0.906 |
|                      | PC(38:0) | 14.27 | 816.6463 | [M+CH3COO] <sup>-</sup> | 37.5±8.8       | 37.5±14.5      | 39.6±10.6      | 36.6±13.3      | 1.00 | 0.92 | 0.136 |
|                      | PC(38:2) | 13.67 | 814.6319 | [M+CH3COO] <sup>-</sup> | 221.3±40.3     | 207.9±31.7     | 203.3±26.9     | 198.5±29.8     | 0.94 | 0.98 | 0.710 |
|                      | PC(38:3) | 12.67 | 812.617  | [M+CH3COO] <sup>-</sup> | 955.1±282.7    | 887.1±203.9    | 879.8±296.1    | 855.6±301.1    | 0.93 | 0.97 | 0.445 |
|                      | PC(38:4) | 11.75 | 810.6013 | [M+CH3COO] <sup>-</sup> | 2828.1±538.4   | 2717.9±537.1   | 2769.9±603.1   | 2984±631.3     | 0.96 | 1.08 | 0.024 |
|                      | PC(38:5) | 9.82  | 808.583  | [M+CH3COO] <sup>-</sup> | 1318.0±181.1   | 1243.9±216.4   | 1326.7±224.2   | 1274.6±209.7   | 0.94 | 0.96 | 0.308 |
|                      | PC(38:6) | 9.28  | 806.5677 | [M+CH3COO] <sup>-</sup> | 6598.3±2021.8  | 6319.2±1974    | 7396.8±1903.4  | 6500.0±1825.2  | 0.96 | 0.88 | 0.010 |
|                      | PC(38:7) | 7.56  | 804.5512 | [M+CH3COO] <sup>-</sup> | 28.7±10.3      | 32.2±14.2      | 30.4±14.3      | 27.1±10.7      | 1.12 | 0.89 | 0.240 |

|             |       |          |                                      |              |              |              |              |      |      |       |
|-------------|-------|----------|--------------------------------------|--------------|--------------|--------------|--------------|------|------|-------|
| PC(40:1)    | 12.1  | 844.6555 | [M+CH <sub>3</sub> COO] <sup>-</sup> | 517.5±34.9   | 503.0±30.0   | 508.2±33.5   | 505.4±38.5   | 0.97 | 0.99 | 0.481 |
| PC(40:2)    | 10.6  | 842.6378 | [M+CH <sub>3</sub> COO] <sup>-</sup> | 183.1±34.5   | 176.6±30.0   | 166.6±31.2   | 170.7±35.3   | 0.96 | 1.02 | 0.505 |
| PC(40:3)    | 9.78  | 840.6205 | [M+CH <sub>3</sub> COO] <sup>-</sup> | 384.5±39.1   | 379.4±41.5   | 385.5±45.0   | 398±41.8     | 0.99 | 1.03 | 0.126 |
| PC(40:4)    | 8.67  | 838.6028 | [M+CH <sub>3</sub> COO] <sup>-</sup> | 214.1±77.2   | 214.6±101.8  | 224.3±85.3   | 215.2±90.2   | 1.00 | 0.96 | 0.784 |
| PC(40:5)    | 11.82 | 836.6161 | [M+CH <sub>3</sub> COO] <sup>-</sup> | 285.0±66.5   | 251.1±70.5   | 291.4±92.3   | 260.7±84.6   | 0.88 | 0.89 | 0.164 |
| PC(40:6)    | 11.2  | 834.6013 | [M+CH <sub>3</sub> COO] <sup>-</sup> | 1537.8±482.4 | 1401.4±365.5 | 1724.3±495.4 | 1510.1±426.2 | 0.91 | 0.88 | 0.026 |
| PC(40:7)    | 8.87  | 832.5831 | [M+CH <sub>3</sub> COO] <sup>-</sup> | 34.0±8.0     | 33.9±6.8     | 31.4±8.1     | 30.5±7.2     | 1.00 | 0.97 | 0.176 |
| PC(40:8)    | 8.1   | 830.5689 | [M+CH <sub>3</sub> COO] <sup>-</sup> | 40.1±8.2     | 42.2±10.0    | 42.0±9.0     | 39.2±9.2     | 1.05 | 0.93 | 0.784 |
| PC(42:10)   | 7.81  | 854.5693 | [M+CH <sub>3</sub> COO] <sup>-</sup> | 11.4±2.3     | 12.1±2.9     | 11.9±2.0     | 11.3±1.9     | 1.06 | 0.95 | 0.136 |
| PC(42:5)    | 13.43 | 864.6532 | [M+CH <sub>3</sub> COO] <sup>-</sup> | 8.2±2.5      | 7.6±2.4      | 7.6±2.6      | 6.6±1.7      | 0.94 | 0.87 | 0.022 |
| PC(42:9)    | 8.79  | 856.5845 | [M+CH <sub>3</sub> COO] <sup>-</sup> | 5.2±1.3      | 5.5±1.7      | 4.9±1.6      | 4.7±1.5      | 1.06 | 0.96 | 0.784 |
| PC p-(36:1) | 13.33 | 772.6209 | [M+CH <sub>3</sub> COO] <sup>-</sup> | 37.4±9.5     | 39.3±13.8    | 33.0±9.3     | 33.4±8.7     | 1.05 | 1.01 | 0.769 |
| PE(34:1)    | 12.04 | 718.5362 | [M-H] <sup>-</sup>                   | 10.4±4.2     | 10.6±4.5     | 10.5±6.0     | 11.4±5.4     | 1.02 | 1.08 | 0.117 |
| PE(34:2)    | 10.43 | 716.5353 | [M-H] <sup>-</sup>                   | 11.9±2.5     | 11.6±2.8     | 11.4±3.0     | 11.2±2.9     | 0.97 | 0.98 | 0.695 |
| PE(36:1)    | 13.78 | 746.5677 | [M-H] <sup>-</sup>                   | 16.9±7.4     | 18.7±13.7    | 17.7±8.3     | 19.3±8.9     | 1.11 | 1.09 | 0.078 |
| PE(36:2)    | 12.56 | 744.5532 | [M-H] <sup>-</sup>                   | 142.9±31.1   | 143.3±39.6   | 137.9±27.8   | 135.3±31.2   | 1.00 | 0.98 | 0.754 |
| PE(36:3)    | 10.51 | 742.5421 | [M-H] <sup>-</sup>                   | 17.7±5.5     | 19.7±12      | 16.5±6.4     | 17.5±6.2     | 1.11 | 1.06 | 0.096 |
| PE(36:4)    | 10.13 | 740.5226 | [M-H] <sup>-</sup>                   | 48.6±12.2    | 46.7±12.6    | 49.0±19.4    | 51.1±14.7    | 0.96 | 1.04 | 0.189 |
| PE(36:5)    | 8.95  | 738.5065 | [M-H] <sup>-</sup>                   | 6.9±2.6      | 6.7±3.0      | 7.4±3.6      | 7.5±3.9      | 0.97 | 1.01 | 0.799 |
| PE(38:2)    | 10.63 | 772.582  | [M-H] <sup>-</sup>                   | 115.6±40.5   | 108.5±44.4   | 110±39.1     | 103.5±34.7   | 0.94 | 0.94 | 0.378 |
| PE(38:3)    | 13.08 | 770.606  | [M-H] <sup>-</sup>                   | 52.3±13.3    | 49.8±11.7    | 46.3±10.2    | 46.9±8.5     | 0.95 | 1.01 | 0.378 |
| PE(38:4)    | 11.72 | 768.5498 | [M-H] <sup>-</sup>                   | 90.4±22.0    | 89.4±22.2    | 91.4±29.8    | 97.2±20.6    | 0.99 | 1.06 | 0.063 |
| PE(38:5)    | 10.2  | 766.5371 | [M-H] <sup>-</sup>                   | 32±5.2       | 31.2±5.3     | 32.1±8.0     | 34.2±6.1     | 0.97 | 1.06 | 0.033 |
| PE(38:6)    | 9.69  | 764.5206 | [M-H] <sup>-</sup>                   | 89.9±18.9    | 84.8±24.2    | 95.8±36.2    | 100.8±31.9   | 0.94 | 1.05 | 0.347 |
| PE(40:5)    | 11.6  | 794.6053 | [M-H] <sup>-</sup>                   | 14.8±2.6     | 15.7±5.1     | 14.2±2.8     | 13.4±2.1     | 1.06 | 0.94 | 0.108 |
| PE(40:6)    | 11.2  | 790.5159 | [M-H] <sup>-</sup>                   | 171.6±50.8   | 169.8±64.3   | 173.3±72.8   | 190.6±74.1   | 0.99 | 1.10 | 0.122 |
| PE(40:7)    | 9.42  | 788.5183 | [M-H] <sup>-</sup>                   | 16.6±4.1     | 17.4±4.8     | 16.1±5.7     | 20.0±4.7     | 1.05 | 1.25 | 0.000 |
| PE o-38:5   | 13.22 | 752.5593 | [M-H] <sup>-</sup>                   | 174.2±55.3   | 197.3±106.6  | 176±73.6     | 177.8±66.8   | 1.13 | 1.01 | 0.769 |
| PE o-(36:2) | 14.15 | 730.5702 | [M-H] <sup>-</sup>                   | 19.0±6.1     | 21.2±8.3     | 18.6±6.1     | 18±3.9       | 1.11 | 0.97 | 0.652 |

|               |             |       |          |                    |              |              |              |              |      |      |       |
|---------------|-------------|-------|----------|--------------------|--------------|--------------|--------------|--------------|------|------|-------|
|               | PE p-(36:1) |       |          |                    |              |              |              |              |      |      |       |
|               | PE p-40:5   | 13.12 | 778.5769 | [M-H] <sup>-</sup> | 26.1±8.6     | 30.7±17.2    | 26.0±9.5     | 25.6±6.7     | 1.18 | 0.98 | 0.518 |
|               | PI(34:1)    | 9.25  | 835.5155 | [M-H] <sup>-</sup> | 25.5±8.2     | 24.5±8.9     | 25.7±7.8     | 22.2±7.5     | 0.96 | 0.86 | 0.055 |
|               | PI(34:2)    | 8.03  | 833.5092 | [M-H] <sup>-</sup> | 26.5±7.8     | 25.5±8.2     | 27.8±7.2     | 24.8±8.5     | 0.96 | 0.89 | 0.100 |
|               | PI(36:1)    | 11.25 | 882.6106 | [M-H] <sup>-</sup> | 5.3±1.2      | 5.2±1.2      | 5.4±1.0      | 5.1±1.3      | 0.97 | 0.94 | 0.147 |
|               | PI(36:2)    | 9.72  | 880.53   | [M-H] <sup>-</sup> | 8.0±1.1      | 7.9±0.9      | 7.8±0.9      | 8.5±1.3      | 0.98 | 1.09 | 0.005 |
|               | PI(36:3)    | 8.46  | 859.5166 | [M-H] <sup>-</sup> | 23.3±10.2    | 21.4±9.7     | 19.6±7.4     | 17.3±8.7     | 0.92 | 0.88 | 0.153 |
|               | PI(36:4)    | 7.84  | 857.5078 | [M-H] <sup>-</sup> | 35.9±12.9    | 33.4±11.3    | 37.9±13.7    | 34.4±12.4    | 0.93 | 0.91 | 0.481 |
|               | PI(38:3)    | 10.11 | 887.557  | [M-H] <sup>-</sup> | 66.5±22.2    | 63.1±18.9    | 56.7±15.1    | 56.7±19.5    | 0.95 | 1.00 | 0.724 |
|               | PI(38:4)    | 9.31  | 885.535  | [M-H] <sup>-</sup> | 766.6±115.9  | 755.6±116.1  | 775.1±126.9  | 751.5±116.1  | 0.99 | 0.97 | 0.126 |
|               | PI(38:5)    | 7.92  | 883.5328 | [M-H] <sup>-</sup> | 9.2±2.5      | 8.9±2.2      | 9.7±2.5      | 9.3±3.1      | 0.96 | 0.95 | 0.638 |
|               | PI(38:6)    | 7.54  | 881.5069 | [M-H] <sup>-</sup> | 6.5±1.9      | 6.2±2.0      | 8.1±3.5      | 6.7±2.8      | 0.95 | 0.83 | 0.081 |
|               | PI(40:5)    | 9.39  | 911.5434 | [M-H] <sup>-</sup> | 21.3±4.2     | 20.4±5.2     | 22.0±6.6     | 20.1±5.8     | 0.96 | 0.91 | 0.104 |
|               | PI(40:6)    | 8.98  | 909.5377 | [M-H] <sup>-</sup> | 47.6±14.4    | 44.2±17.4    | 55.4±25.2    | 47.2±24.1    | 0.93 | 0.85 | 0.183 |
| Sphingolipids | Cer(d40:1)  | 14.8  | 622.6135 | [M+H] <sup>+</sup> | 21.5±4.5     | 22.8±5.2     | 21.2±4.2     | 20.7±4.5     | 1.06 | 0.98 | 0.210 |
|               | Cer(d40:3)  | 14.94 | 618.617  | [M+H] <sup>+</sup> | 19.3±3.8     | 20.2±5       | 19.5±4.3     | 19.6±4.8     | 1.04 | 1.00 | 0.531 |
|               | Cer(d42:1)  | 15.07 | 650.6424 | [M+H] <sup>+</sup> | 67.4±13.8    | 71.0±17.9    | 69.2±15.0    | 68.2±15.2    | 1.05 | 0.99 | 0.290 |
|               | Cer(d42:2)  | 14.57 | 648.6304 | [M+H] <sup>+</sup> | 4.6±0.8      | 4.8±0.9      | 4.8±1.0      | 4.4±0.6      | 1.04 | 0.91 | 0.016 |
|               | SM(d30:1)   | 6.57  | 647.5094 | [M+H] <sup>+</sup> | 12.7±5.5     | 13.5±6.0     | 11.6±3.7     | 10.3±3.0     | 1.07 | 0.89 | 0.071 |
|               | SM(d30:2)   | 5.71  | 645.4958 | [M+H] <sup>+</sup> | 1.8±0.9      | 1.9±0.9      | 1.6±0.6      | 1.5±0.5      | 1.09 | 0.90 | 0.273 |
|               | SM(d32:0)   | 8.46  | 677.5563 | [M+H] <sup>+</sup> | 9.2±2.5      | 9.5±3.4      | 8.6±1.9      | 7.7±1.9      | 1.04 | 0.89 | 0.016 |
|               | SM(d32:1)   | 7.89  | 675.5426 | [M+H] <sup>+</sup> | 302.0±83.7   | 316.9±105.2  | 293.2±85.6   | 270.0±69.2   | 1.05 | 0.92 | 0.011 |
|               | SM(d32:2)   | 6.7   | 673.5281 | [M+H] <sup>+</sup> | 24.8±5.8     | 24.1±7.2     | 23.5±5.4     | 22.5±5.3     | 0.97 | 0.96 | 0.122 |
|               | SM(d34:0)   | 10.36 | 705.5894 | [M+H] <sup>+</sup> | 141.3±26.7   | 142.5±22.3   | 140.5±21.7   | 128.4±26.2   | 1.01 | 0.91 | 0.014 |
|               | SM(d34:1)   | 9.62  | 703.5726 | [M+H] <sup>+</sup> | 3212.4±396.2 | 3178.9±342.0 | 3155.3±369.0 | 2955.3±412.6 | 0.99 | 0.94 | 0.008 |
|               | SM(d34:2)   | 8.06  | 701.5578 | [M+H] <sup>+</sup> | 508.2±79.8   | 492.9±74.1   | 494.0±62.0   | 481.9±86.1   | 0.97 | 0.98 | 0.122 |
|               | SM(d36:0)   | 12.58 | 733.6223 | [M+H] <sup>+</sup> | 21.0±7.7     | 22.1±10.1    | 21.6±6.9     | 20.8±6.7     | 1.05 | 0.96 | 0.337 |
|               | SM(d36:1)   | 11.65 | 731.6042 | [M+H] <sup>+</sup> | 7.5±2.9      | 7.2±3.1      | 7.8±3.2      | 6.6±2.8      | 0.95 | 0.84 | 0.033 |
|               | SM(d36:2)   | 9.79  | 729.5884 | [M+H] <sup>+</sup> | 355.0±72.0   | 351.2±92.1   | 346.5±53.9   | 354.2±76.1   | 0.99 | 1.02 | 0.624 |

|               |           |       |          |                      |              |              |              |              |      |      |       |
|---------------|-----------|-------|----------|----------------------|--------------|--------------|--------------|--------------|------|------|-------|
|               | SM(d36:3) | 8.22  | 727.5729 | [M+H] <sup>+</sup>   | 7.1±1.9      | 7.0±2.1      | 6.9±1.5      | 7.4±1.8      | 0.99 | 1.06 | 0.170 |
|               | SM(d38:0) | 13.97 | 761.6511 | [M+H] <sup>+</sup>   | 16.7±5.8     | 17.8±5.9     | 17.9±5.7     | 16.6±4.5     | 1.07 | 0.93 | 0.060 |
|               | SM(d38:1) | 13.6  | 759.638  | [M+H] <sup>+</sup>   | 473.5±84.2   | 496.8±102.3  | 485.3±89.0   | 466.3±78.4   | 1.05 | 0.96 | 0.044 |
|               | SM(d38:2) | 11.61 | 757.6198 | [M+H] <sup>+</sup>   | 13.0±4.1     | 12.3±3.2     | 12.6±2.8     | 11.3±2.5     | 0.95 | 0.90 | 0.022 |
|               | SM(d40:1) | 14.36 | 787.6655 | [M+H] <sup>+</sup>   | 1149.6±154.6 | 1177.5±175.5 | 1165.4±200.2 | 1106.0±170.7 | 1.02 | 0.95 | 0.026 |
|               | SM(d40:2) | 13.63 | 785.6485 | [M+H] <sup>+</sup>   | 285.4±81.4   | 287.2±79.8   | 293.3±61.6   | 274.2±58.7   | 1.01 | 0.93 | 0.019 |
|               | SM(d40:6) | 9.4   | 777.5806 | [M+H] <sup>+</sup>   | 9.2±1.8      | 8.6±1.5      | 8.6±1.1      | 7.9±1.2      | 0.94 | 0.92 | 0.002 |
|               | SM(d42:1) | 14.48 | 815.701  | [M+H] <sup>+</sup>   | 885.1±144.4  | 884.4±149.3  | 890.5±145.0  | 855.4±155.0  | 1.00 | 0.96 | 0.071 |
|               | SM(d42:2) | 14.3  | 813.6816 | [M+H] <sup>+</sup>   | 2406.5±456.3 | 2384.4±363.4 | 2425.4±354.0 | 2366.6±412.1 | 0.99 | 0.98 | 0.281 |
|               | SM(d44:2) | 14.75 | 841.7181 | [M+H] <sup>+</sup>   | 21.7±5.8     | 22.0±4.5     | 23.6±5.6     | 22.6±6.2     | 1.02 | 0.96 | 0.318 |
| Glycerolipids | DG(32:0)  | 14.09 | 586.538  | [M+NH4] <sup>+</sup> | 7.7±3.7      | 7.4±3.6      | 7.7±4.7      | 7.0±4.2      | 0.96 | 0.91 | 0.724 |
|               | DG(32:1)  | 12.93 | 584.5237 | [M+NH4] <sup>+</sup> | 7.1±4.8      | 6.3±3.6      | 7.0±5.2      | 6.2±4.3      | 0.89 | 0.88 | 0.666 |
|               | DG(32:2)  | 11.11 | 582.5103 | [M+NH4] <sup>+</sup> | 2.3±1.5      | 2.1±1.1      | 2.4±1.6      | 2.0±1.1      | 0.92 | 0.81 | 0.299 |
|               | DG(34:0)  | 14.62 | 614.5723 | [M+NH4] <sup>+</sup> | 10.7±2.0     | 10.7±2.1     | 11.0±3.0     | 11.3±2.8     | 1.00 | 1.02 | 0.399 |
|               | DG(34:1)  | 14.1  | 612.5543 | [M+NH4] <sup>+</sup> | 53.6±29.0    | 50.4±24.2    | 53.9±26.3    | 53.9±24.5    | 0.94 | 1.00 | 0.829 |
|               | DG(34:2)  | 13.3  | 610.541  | [M+NH4] <sup>+</sup> | 34.5±15.4    | 33.2±14.6    | 35.8±15.5    | 34.1±11.8    | 0.96 | 0.95 | 0.814 |
|               | DG(36:0)  | 14.99 | 642.5999 | [M+NH4] <sup>+</sup> | 10.8±1.1     | 11.7±2.5     | 11.0±1.2     | 12.4±2.8     | 1.08 | 1.13 | 0.012 |
|               | DG(36:1)  | 14.64 | 640.5878 | [M+NH4] <sup>+</sup> | 15.3±8.5     | 14.1±5.2     | 15.1±6.3     | 15.6±7.3     | 0.92 | 1.03 | 0.652 |
|               | DG(36:2)  | 14.13 | 638.573  | [M+NH4] <sup>+</sup> | 107.7±50.7   | 103.4±44.5   | 117.3±48.7   | 128.6±43.5   | 0.96 | 1.10 | 0.142 |
|               | DG(36:3)  | 13.36 | 636.5559 | [M+NH4] <sup>+</sup> | 117.7±50.3   | 116.4±51.6   | 132.6±56.4   | 139.1±44.3   | 0.99 | 1.05 | 0.468 |
|               | DG(38:1)  | 14.67 | 668.6116 | [M+NH4] <sup>+</sup> | 2.4±0.6      | 2.4±0.5      | 2.5±0.5      | 2.4±0.7      | 0.98 | 0.96 | 0.189 |
|               | DG(38:3)  | 14.25 | 664.5699 | [M+NH4] <sup>+</sup> | 4.6±1.3      | 4.6±1.3      | 4.9±1.4      | 5.0±1.5      | 0.99 | 1.02 | 0.953 |
|               | DG(38:5)  | 12.94 | 660.5559 | [M+NH4] <sup>+</sup> | 10.3±4.7     | 9.6±3.1      | 10.0±5.3     | 11.0±3.8     | 0.93 | 1.09 | 0.016 |
|               | DG(40:7)  | 12.32 | 684.5508 | [M+NH4] <sup>+</sup> | 10.0±6.0     | 9.8±6.2      | 11.2±6.4     | 12.0±8.0     | 0.97 | 1.07 | 0.666 |
|               | TG(40:0)  | 15.2  | 712.6439 | [M+NH4] <sup>+</sup> | 7.0±10.4     | 9.0±13.1     | 5.5±3.3      | 4.8±1.9      | 1.29 | 0.88 | 0.829 |
|               | TG(40:1)  | 15.01 | 710.6291 | [M+NH4] <sup>+</sup> | 3.3±3.7      | 4.6±7.1      | 3.2±3.9      | 2.5±2.6      | 1.41 | 0.80 | 0.938 |
|               | TG(42:1)  | 15.22 | 738.6587 | [M+NH4] <sup>+</sup> | 6.5±5.2      | 8.9±11.0     | 6.7±6.2      | 5.4±4.5      | 1.36 | 0.80 | 0.681 |
|               | TG(42:2)  | 15.01 | 736.6438 | [M+NH4] <sup>+</sup> | 5.3±4.4      | 7.7±10.2     | 5.4±4.3      | 4.8±3.3      | 1.47 | 0.88 | 0.906 |
|               | TG(44:1)  | 15.41 | 766.6916 | [M+NH4] <sup>+</sup> | 13.6±9.7     | 15.9±15.2    | 14.0±12.3    | 11.3±9.8     | 1.17 | 0.81 | 0.570 |



|          |       |          |                      |             |             |             |             |      |      |       |
|----------|-------|----------|----------------------|-------------|-------------|-------------|-------------|------|------|-------|
| TG(44:2) | 15.24 | 764.6766 | [M+NH4] <sup>+</sup> | 9.3±6.6     | 11.9±12.8   | 9.8±8.9     | 8.0±6.3     | 1.27 | 0.82 | 0.814 |
| TG(46:0) | 15.72 | 796.7411 | [M+NH4] <sup>+</sup> | 14.7±8.9    | 15.9±10.5   | 14.0±9.2    | 11.7±6.7    | 1.09 | 0.83 | 0.695 |
| TG(46:1) | 15.55 | 794.7182 | [M+NH4] <sup>+</sup> | 36.4±24.0   | 40.1±30.6   | 36.4±28.4   | 31.3±23.8   | 1.10 | 0.86 | 0.953 |
| TG(46:2) | 15.42 | 792.704  | [M+NH4] <sup>+</sup> | 30.3±18.4   | 34.8±27.1   | 31.3±22.7   | 26.8±17.2   | 1.15 | 0.86 | 0.922 |
| TG(46:3) | 15.29 | 790.6903 | [M+NH4] <sup>+</sup> | 12.2±7.0    | 13.3±8.9    | 12.5±8.4    | 11.1±6.3    | 1.09 | 0.88 | 0.860 |
| TG(46:4) | 15.07 | 788.6781 | [M+NH4] <sup>+</sup> | 4.7±2.2     | 5.0±2.9     | 4.7±2.6     | 4.2±2.0     | 1.08 | 0.91 | 0.710 |
| TG(48:0) | 15.84 | 824.7672 | [M+NH4] <sup>+</sup> | 13.8±6.2    | 14.5±6.6    | 13.2±6.1    | 11.8±3.9    | 1.05 | 0.89 | 0.624 |
| TG(48:1) | 15.7  | 822.7536 | [M+NH4] <sup>+</sup> | 82.8±49.0   | 81.4±43.3   | 79.8±49.4   | 73.3±44.9   | 0.98 | 0.92 | 0.953 |
| TG(48:2) | 15.56 | 820.7375 | [M+NH4] <sup>+</sup> | 99.9±50.5   | 100.8±45.5  | 101.4±55.3  | 93.8±45.7   | 1.01 | 0.93 | 0.953 |
| TG(48:3) | 15.4  | 818.7219 | [M+NH4] <sup>+</sup> | 56.4±27.3   | 58±25.5     | 58.9±30.6   | 55.8±23.0   | 1.03 | 0.95 | 0.695 |
| TG(48:4) | 15.24 | 816.7038 | [M+NH4] <sup>+</sup> | 21.5±11.5   | 22.9±12.5   | 22.3±12.3   | 21.3±8.6    | 1.07 | 0.96 | 0.710 |
| TG(50:1) | 15.83 | 850.7842 | [M+NH4] <sup>+</sup> | 164.1±67.0  | 163.6±60.8  | 159.7±63.0  | 160.2±61.5  | 1.00 | 1.00 | 0.681 |
| TG(50:2) | 15.7  | 848.77   | [M+NH4] <sup>+</sup> | 284.2±94.4  | 281.8±90.7  | 286.9±100.5 | 293.7±92.3  | 0.99 | 1.02 | 0.652 |
| TG(50:3) | 15.55 | 846.7538 | [M+NH4] <sup>+</sup> | 232.7±66.5  | 230.9±66.3  | 244.3±76.8  | 251.3±63.8  | 0.99 | 1.03 | 0.681 |
| TG(50:4) | 15.43 | 844.7372 | [M+NH4] <sup>+</sup> | 107.2±41.1  | 104.9±34.8  | 112.9±38.6  | 116.5±31.5  | 0.98 | 1.03 | 0.724 |
| TG(50:5) | 15.3  | 842.7209 | [M+NH4] <sup>+</sup> | 34.5±17.3   | 32.1±13.5   | 34.6±15.0   | 34.8±11.8   | 0.93 | 1.01 | 0.953 |
| TG(50:6) | 15.18 | 840.7095 | [M+NH4] <sup>+</sup> | 11.4±5.3    | 11.0±5.0    | 11.3±5.4    | 11±4.2      | 0.96 | 0.98 | 0.906 |
| TG(52:1) | 15.93 | 878.8159 | [M+NH4] <sup>+</sup> | 25.0±7.6    | 26.0±7.3    | 25.3±7.2    | 26.4±8.3    | 1.04 | 1.04 | 0.357 |
| TG(52:2) | 15.81 | 876.7979 | [M+NH4] <sup>+</sup> | 468.0±126.6 | 486.8±141.9 | 504.9±135.2 | 562.0±113.2 | 1.04 | 1.11 | 0.050 |
| TG(52:3) | 15.71 | 874.7855 | [M+NH4] <sup>+</sup> | 730.4±170.3 | 769.2±219.3 | 814.5±214.6 | 884.1±187.4 | 1.05 | 1.09 | 0.126 |
| TG(52:4) | 15.58 | 872.7691 | [M+NH4] <sup>+</sup> | 554.2±156.9 | 567.9±180.6 | 615.1±175.4 | 656.7±155.1 | 1.02 | 1.07 | 0.256 |
| TG(52:5) | 15.46 | 870.7513 | [M+NH4] <sup>+</sup> | 220.2±75.9  | 212.2±83.8  | 235.5±71.6  | 253.1±65.6  | 0.96 | 1.07 | 0.411 |
| TG(52:6) | 15.31 | 868.7366 | [M+NH4] <sup>+</sup> | 65.4±30.6   | 59.9±27.4   | 66.3±23.9   | 71.9±23.2   | 0.91 | 1.08 | 0.399 |
| TG(54:1) | 16.04 | 906.8357 | [M+NH4] <sup>+</sup> | 9.8±0.9     | 10.2±1.2    | 9.9±0.9     | 10.5±1.1    | 1.04 | 1.07 | 0.008 |
| TG(54:3) | 15.8  | 902.8189 | [M+NH4] <sup>+</sup> | 119.9±31.5  | 130.9±46.5  | 134.3±40.9  | 159.1±40.4  | 1.09 | 1.18 | 0.016 |
| TG(54:4) | 15.66 | 901.8013 | [M+NH4] <sup>+</sup> | 24.0±7.6    | 25.8±11.1   | 27.5±11.8   | 28.9±10.0   | 1.08 | 1.05 | 0.724 |
| TG(54:5) | 15.57 | 898.7836 | [M+NH4] <sup>+</sup> | 228.6±70.5  | 247.9±101.8 | 251.3±74.6  | 287±75.4    | 1.08 | 1.14 | 0.085 |
| TG(54:6) | 15.45 | 896.7687 | [M+NH4] <sup>+</sup> | 199.1±71.6  | 211.0±95.8  | 213.4±62.6  | 238.1±62.7  | 1.06 | 1.12 | 0.224 |
| TG(54:7) | 15.31 | 894.7516 | [M+NH4] <sup>+</sup> | 112.4±48.2  | 113.4±55.9  | 119.3±41.4  | 128.5±41.0  | 1.01 | 1.08 | 0.544 |

|           |       |          |                      |            |            |            |            |      |      |       |
|-----------|-------|----------|----------------------|------------|------------|------------|------------|------|------|-------|
| TG(54:8)  | 15.16 | 892.7333 | [M+NH4] <sup>+</sup> | 38.3±17.5  | 36.9±19.0  | 38.8±15.3  | 42.0±17.1  | 0.96 | 1.08 | 0.531 |
| TG(56:5)  | 15.78 | 926.8164 | [M+NH4] <sup>+</sup> | 30.5±8.1   | 30.5±8.4   | 30.5±6.4   | 35.3±7.1   | 1.00 | 1.16 | 0.010 |
| TG(56:6)  | 15.65 | 924.7967 | [M+NH4] <sup>+</sup> | 75.2±19.3  | 74.8±21.2  | 77.6±17.1  | 87.0±18.1  | 0.99 | 1.12 | 0.060 |
| TG(56:7)  | 15.6  | 922.7828 | [M+NH4] <sup>+</sup> | 129.4±41.8 | 130.5±45.4 | 137.9±43.8 | 148.7±41.0 | 1.01 | 1.08 | 0.308 |
| TG(56:8)  | 15.47 | 920.7675 | [M+NH4] <sup>+</sup> | 111.0±41.7 | 113.1±45.6 | 122.5±49.3 | 129.5±45.0 | 1.02 | 1.06 | 0.531 |
| TG(56:9)  | 15.31 | 918.7524 | [M+NH4] <sup>+</sup> | 42.5±16.1  | 41.6±18.7  | 45.5±20.4  | 48.6±20.6  | 0.98 | 1.07 | 0.481 |
| TG(58:9)  | 15.45 | 946.7872 | [M+NH4] <sup>+</sup> | 34.1±15.1  | 35.4±17.5  | 38.8±22.0  | 40.9±17.3  | 1.04 | 1.05 | 0.468 |
| TG(58:10) | 15.32 | 944.7747 | [M+NH4] <sup>+</sup> | 28.8±13.0  | 28.9±15.4  | 31.3±17.1  | 32.9±15.3  | 1.00 | 1.05 | 0.389 |
| TG(60:12) | 15.36 | 968.7707 | [M+NH4] <sup>+</sup> | 14.0±9.3   | 15.0±13.8  | 14.8±11.1  | 14.3±9.4   | 1.07 | 0.97 | 0.784 |

Data are presented as the means ± standard deviations. Intensity was divided by 10<sup>4</sup>. *p*-values were calculated from the Wilcoxon rank signed tests. Abbreviations: FFA, free fatty acid; LysoPC, lysophosphatidylcholine;

LysoPE, lysophosphatidylethanolamine; PC, phosphatidylcholine; PE, phosphatidylethanolamine; PI, phosphatidylinositol; Cer, ceramide; SM, sphingomyelin; DG, diglyceride; TG, triglyceride.

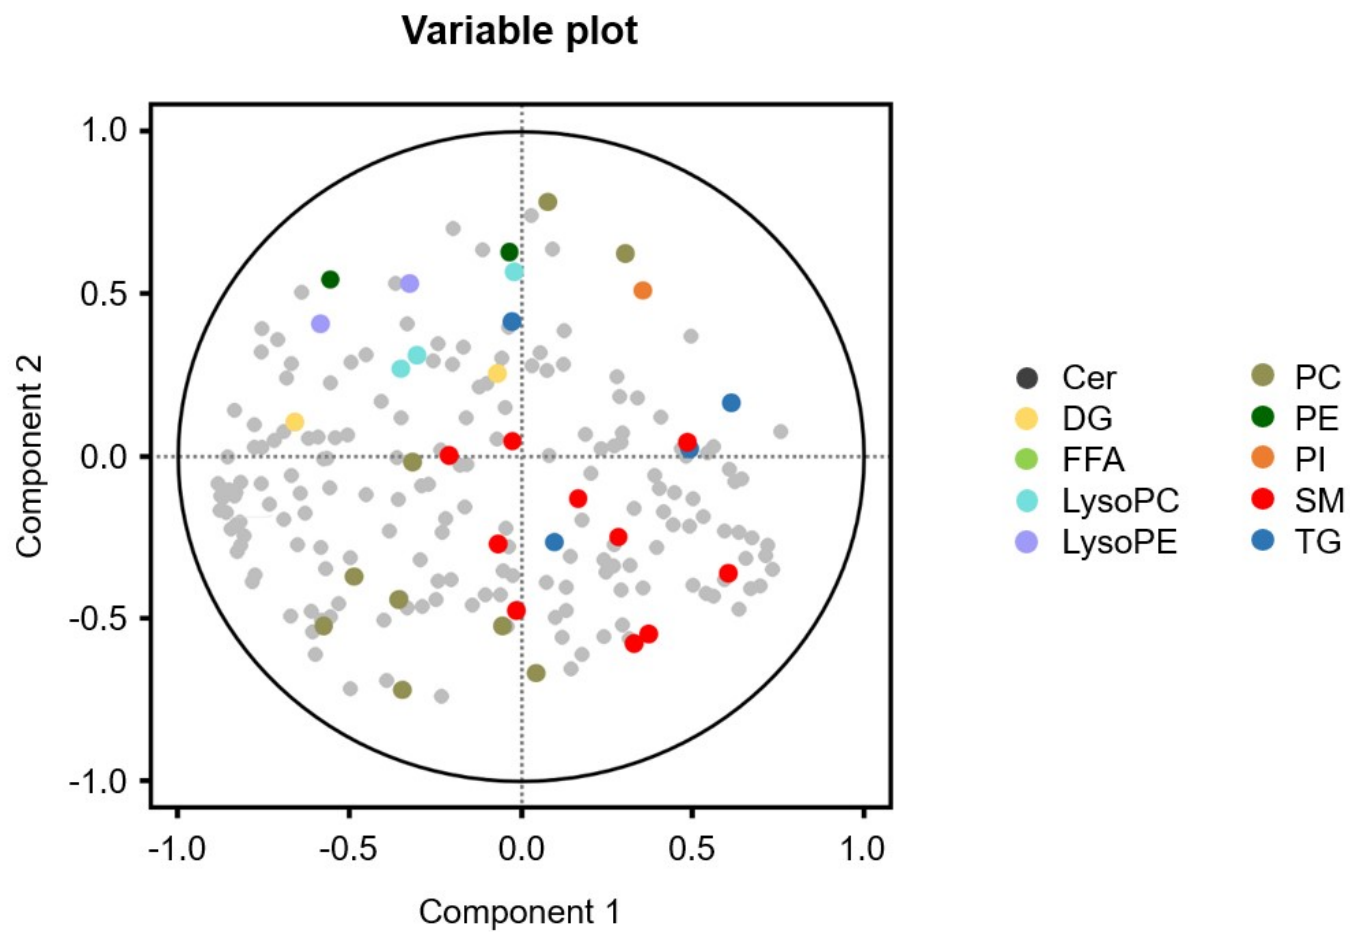

**Figure S1.** The PCA loading plot of plasma lipid extracts in the YYR groups. The lipid metabolites exhibiting significant differences ( $p < 0.05$ ) in the plasma were presented in the loading plot.
